# Supplementary material for: Optimal Process Network for Integrated Solid Waste Management in Davao City, Philippines
Source: MDPI journal article supplement (doi:10.3390/su14042419), 2022-02-20
Supplement: s1 [file s1]

## SUPPORTING INFORMATION

**Table S1:** Comparison of optimization models for solid waste management

| References                       | Treatment               | Objective function |                                | Decision variables |         |          |       |         |        |        |         |
|----------------------------------|-------------------------|--------------------|--------------------------------|--------------------|---------|----------|-------|---------|--------|--------|---------|
|                                  |                         | Max profit         | Others                         | ResAlloc           | SysCost | Location | PreTr | TechCap | Divert | GWP    | ProdDem |
| Badran & El-Haggar (2006)        | TS, C, L                |                    | Min collection /transport cost | ✓                  | ✓       | ✓        | ✓     | ✓       |        |        |         |
| Dai et al. (2011)                | TS, C, I, L             | ✓                  | Facility expansion             | ✓                  | ✓       | ✓        | ✓     | Calc    | ✓      |        |         |
| Rodionov & Nakata (2011)         | C, R, I, AD, RDF, LFGRS |                    | Min net cost                   | ✓                  | ✓       | ✓        |       | ✓       | ✓      | ✓      |         |
| Ng et al. (2013)                 | I, AD, L                | ✓                  |                                | ✓                  | ✓       | ✓        |       | ✓       |        | ✓      |         |
| Santibañez-Aguilar et al. (2013) | R, I, G                 | ✓                  | Max MSW consumption            |                    | ✓       | ✓        | ✓     |         | ✓      |        | Rec     |
| Tan et al. (2014)                | C, R, I, LFGRS          | ✓                  |                                | ✓                  | ✓       |          |       | Calc    |        | ✓      | WTE     |
| Yousefloo & Babazadeh (2020)     | TS, R, I, G, AD, LFGRS  | ✓                  | Risk minimization              | ✓                  | ✓       | ✓        | ✓     | ✓       |        | in USD |         |

Note: **TS**- Transfer station, **C**- Composting, **L**- Landfill, **I**- Incineration, **R**- Recycling, **G**- Gasification, **AD**- Anaerobic digestion, **RDF**- Refuse-derived fuel, **LFGRS**- Landfill gas recovery system, **ResAlloc**- Waste source separation rate of 100% is set for the total waste, **SysCost**- MSW management system cost, **Location**- Transportation and facility location, **PreTr**- Waste separation and pretreatment, **TechCap**- Processing technology capacity, **Divert**- Waste diversion target or landfill disposal constraint, **GWP**- Global warming potential (in CO<sub>2</sub>-eq.), **ProdDem**- Maximum MSW by-product demand, **Calc**- Calculated, **Rec**- Recyclables, **WTE**- Renewable energy demand from MSW.

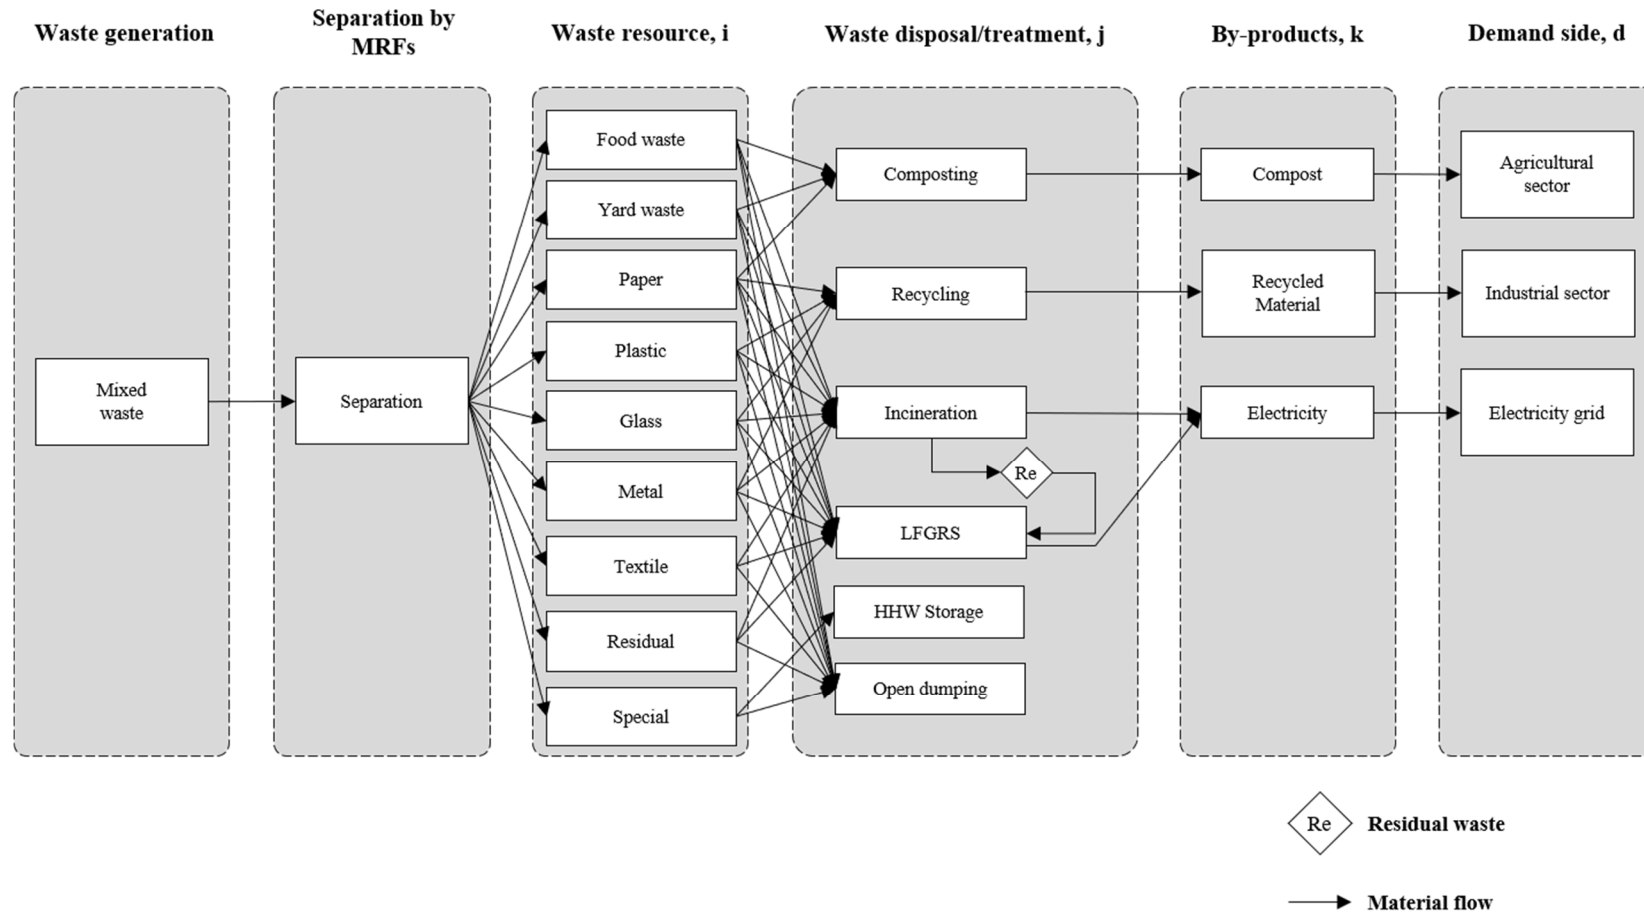

**Figure S1:** Process network of MSWM for 2027 in Davao City, Philippines

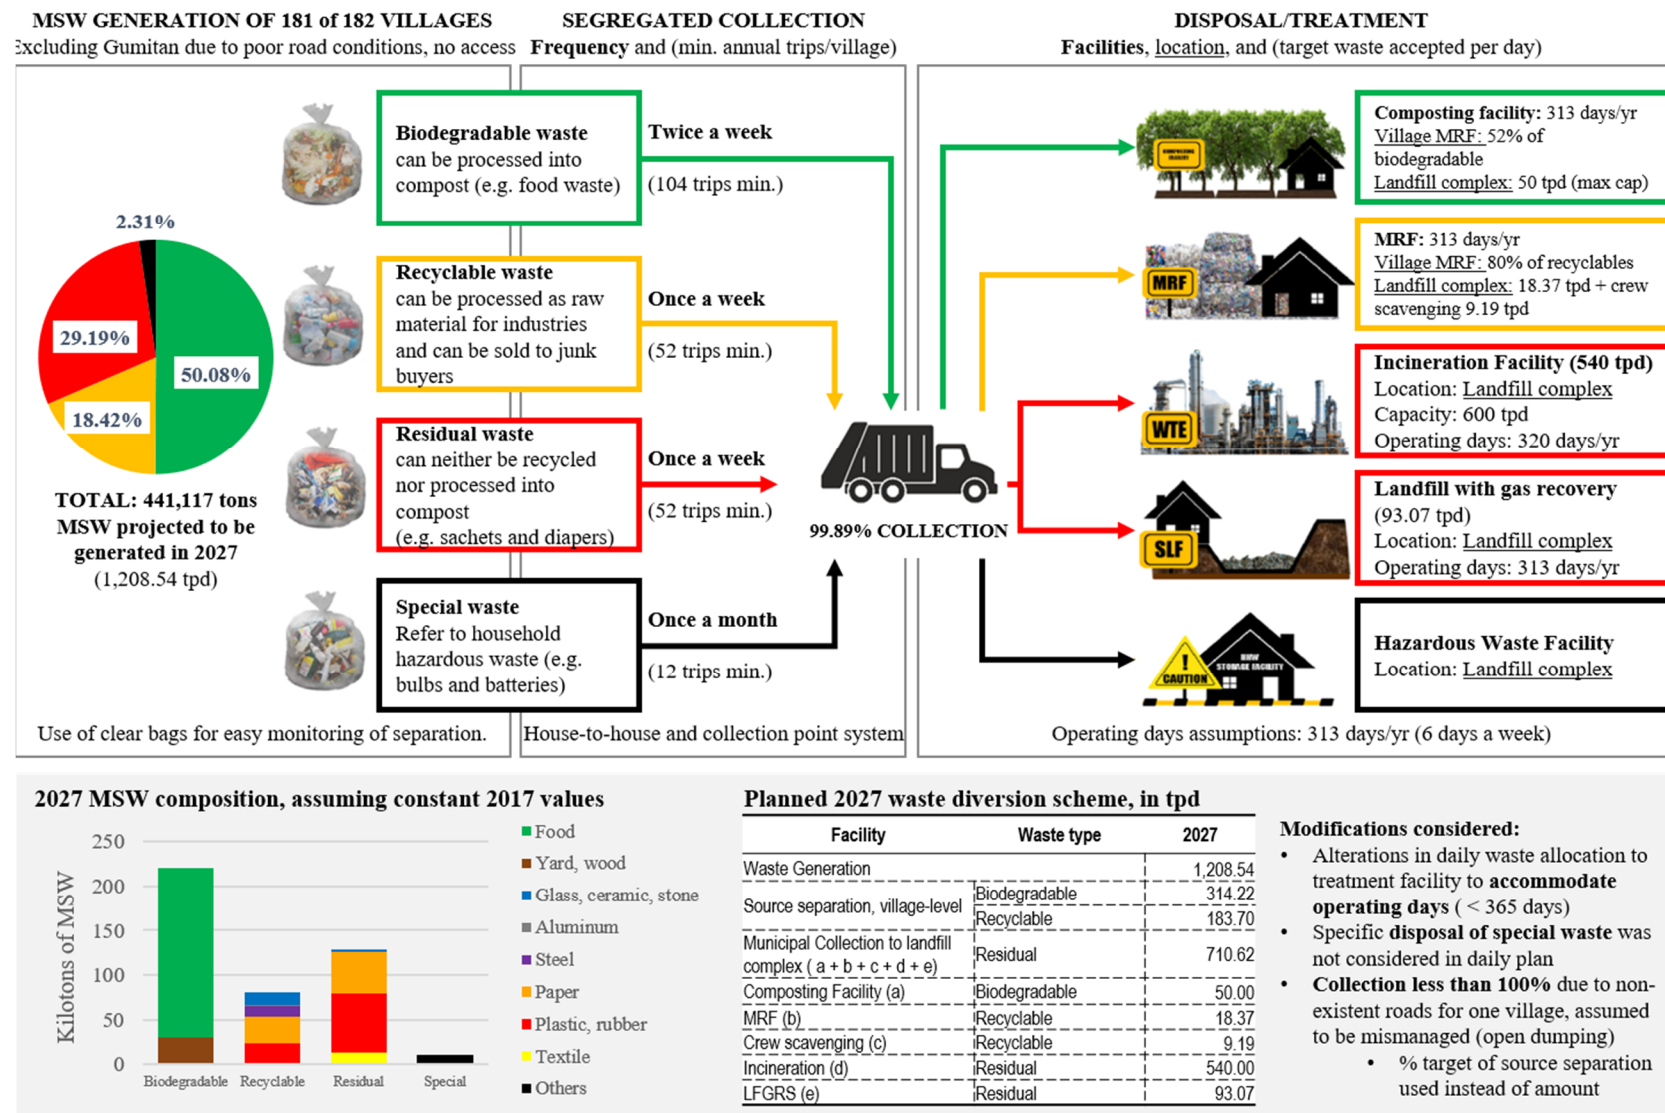

**Figure S2:** MSW collection, separation, and treatment/disposal options of the 2027 scenario

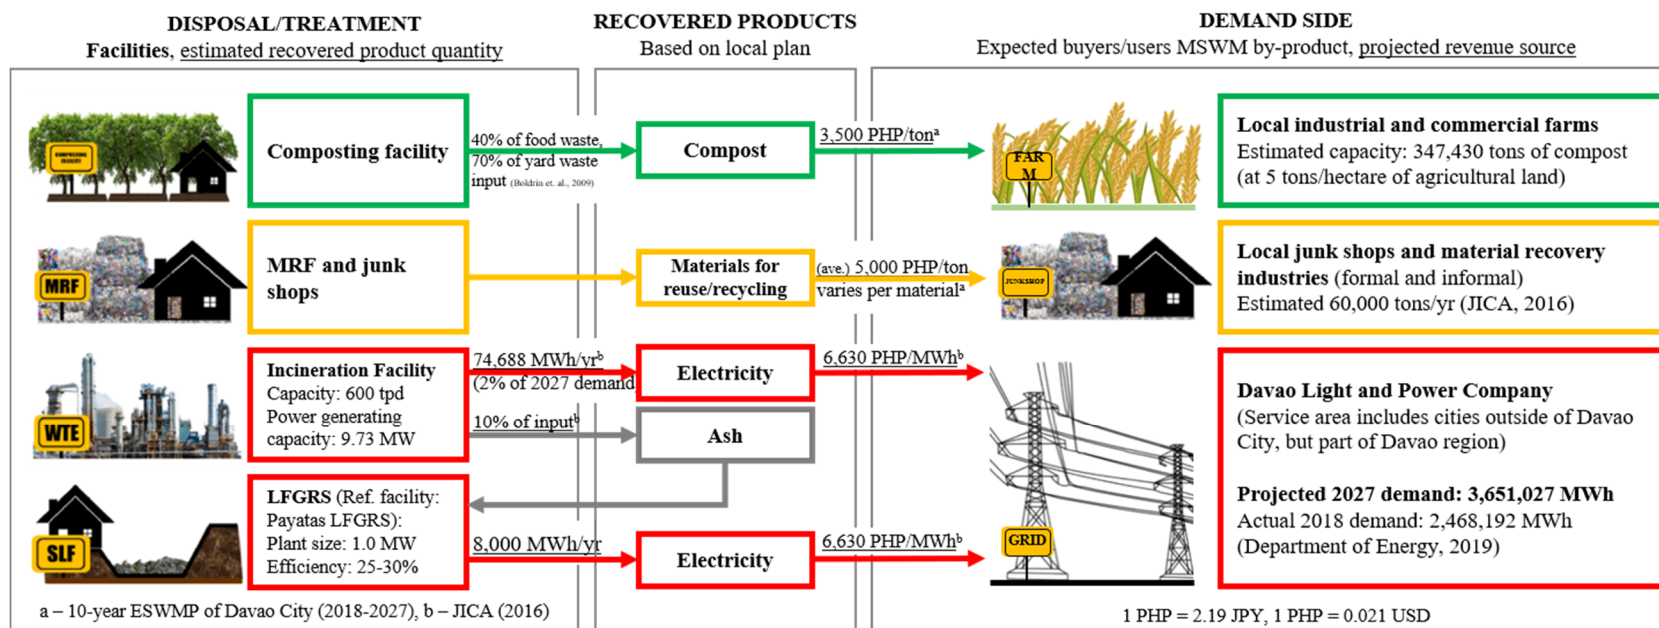

Price of recyclables (unit: PHP/ton): glass (2000), steel (5000), aluminum (35,000), plastic (25,000) (City Government of Davao, 2017), and paper (3000) (Asian Development Bank, 2013)

The demand for the recovered products was projected assuming that the current status of the agricultural land use and recyclables demands would not change until 2027, whereas the projection of the future power demand was cited from the Department of Energy (2019).

**Figure S3:** Supply and demand for the recovered MSWM products of the 2027 scenario

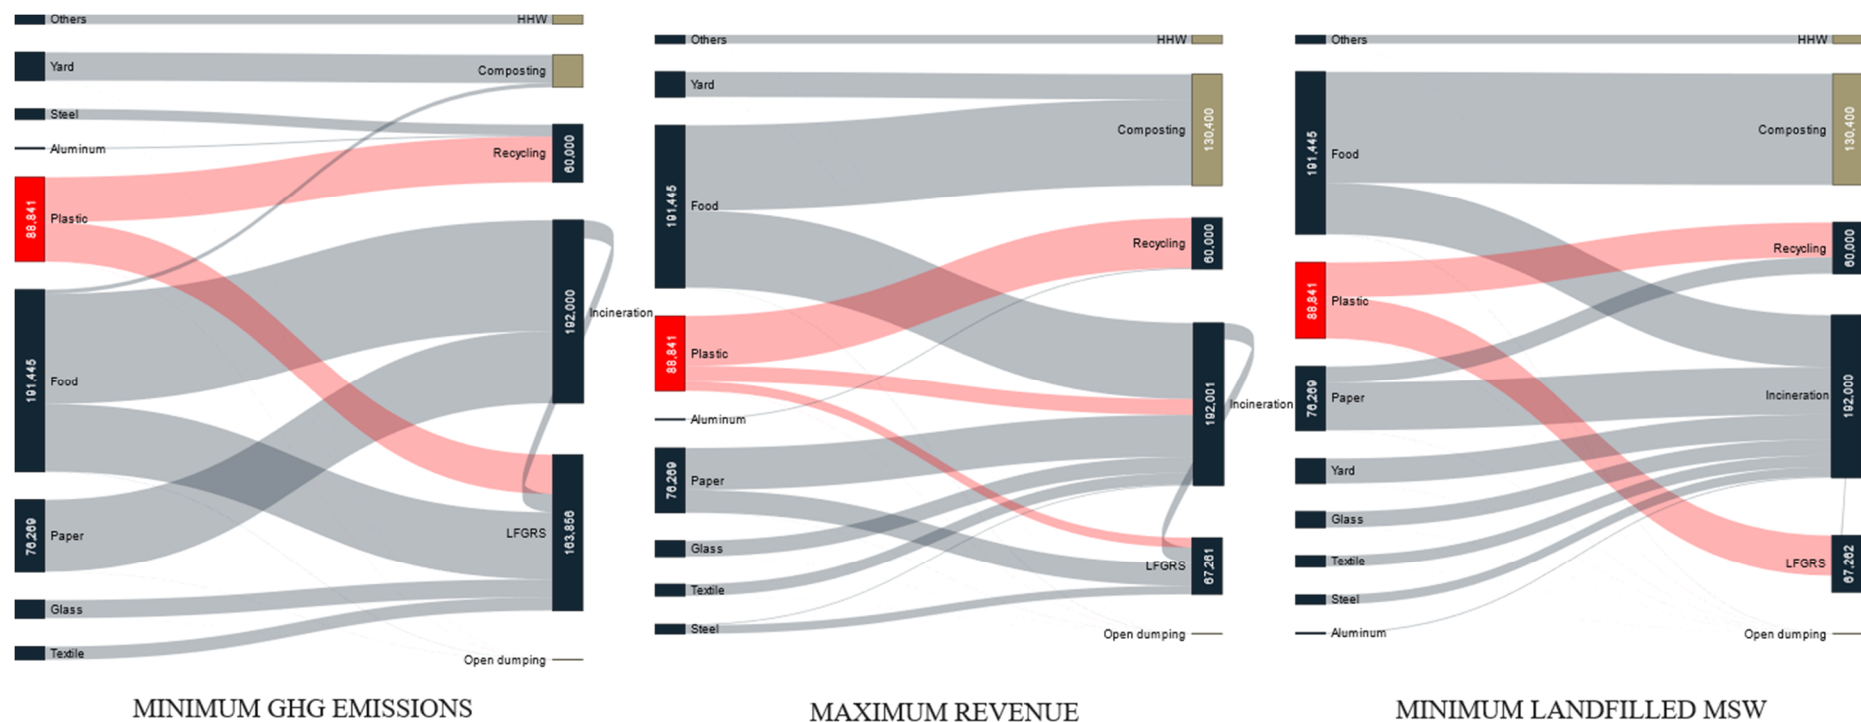

**Figure S4:** Changes to the material flow in optimization scenarios when availability coefficient is disabled

## REFERENCES FOR SUPPORTING INFORMATION

- Asian Development Bank. (2013). Materials recovery facility tool kit. Mandaluyong City, Philippines. Retrieved from <https://www.adb.org/sites/default/files/publication/30220/materials-recovery-facility-tool-kit.pdf>. (Accessed December 2020).
- Badran, M. F., & El-Haggar, S. M. (2006). Optimization of municipal solid waste management in Port Said–Egypt. *Waste Management* **26** (5), 534-545.
- City Government of Davao. (2017). 10-Year Solid Waste Management Plan of Davao City for 2018-2027. Davao City, Philippines.
- Dai, C., Li, Y. P., & Huang, G. H. (2011). A two-stage support-vector-regression optimization model for municipal solid waste management – A case study of Beijing, China. *Journal of Environmental Management* **92** (12), 3023-3037. <https://doi.org/10.1016/j.jenvman.2011.06.038>
- Department of Energy. (2019). Power supply procurement plan. Retrieved from [https://www.doe.gov.ph/sites/default/files/pdf/du\\_csp/2019-2028\\_DLPC\\_PSPP.pdf](https://www.doe.gov.ph/sites/default/files/pdf/du_csp/2019-2028_DLPC_PSPP.pdf) (Accessed December 2020).
- Ng, W., Varbanov, P., Klemeš, J., Hegyháti, M., Bertok, B., Heckl, I., & Lam, H. (2013). Waste to energy for small cities: Economics versus carbon footprint. *Chemical Engineering Transactions* **35**, 889-894. <https://doi.org/10.3303/CET1335148>
- Santibañez-Aguilar, J. E., Ponce-Ortega, J. M., Betzabe González-Campos, J. B., Serna-González, M., & El-Halwagi, M. M. (2013). Optimal planning for the sustainable utilization of municipal solid waste. *Waste Management* **33** (12), 2607-2622. <https://doi.org/10.1016/j.wasman.2013.08.010>
- Tan, S. T., Lee, C. T., Hashim, H., Ho, W. S., & Lim, J. S. (2014). Optimal process network for municipal solid waste management in Iskandar Malaysia. *Journal of Cleaner Production* **71**, 48-58. <https://doi.org/10.1016/j.jclepro.2013.12.005>
- Yousefloo, A., & Babazadeh, R. (2020). Designing an integrated municipal solid waste management network: A case study. *Journal of Cleaner Production* **244**, 118824. <https://doi.org/10.1016/j.jclepro.2019.118824>
